# Supplementary material for: Novel cationic meso-CF3 BODIPY-based AIE fluorescent rotors for imaging viscosity in mitochondria
Source: Royal Society of Chemistry journal article supplement (doi:10.1039/d1cc06532g), 2022-01-01
Supplement: d1cc06532g1.pdf [file d1cc06532g1.pdf]

## Electronic Supporting Information

### **Novel cationic *meso*-CF<sub>3</sub> BODIPY-based AIE fluorescent rotors for imaging viscosity in mitochondria**

Wen-Jing Shi,<sup>\*‡</sup> Jinrong Yang,<sup>‡</sup> Yong-Feng Wei, Xiao-Tong Li, Xu-Hui Yan, Yuxuan Wang, Huaxiang Leng, Liyao Zheng and Jin-wu Yan<sup>\*</sup>

#### Contents

Experimental section

**Scheme S1.** Synthetic route of near-infrared fluorescent probes **2** and **3**.

**Fig. S1.** (a) UV-Vis and (b) fluorescence spectra of **2** in different solvents.

**Table S1.** The spectroscopic properties of **2** in different solvents.

**Fig. S2.** (a) UV-Vis and (b) fluorescence spectra of **3** in different solvents.

**Table S2.** The spectroscopic properties of **3** in different solvents.

**Fig. S3.** (a) Fluorescence spectra of **3** in glycerol-H<sub>2</sub>O mixtures with increasing viscosity from 1.0 to 950.2 cp. (b) The linear relationship of **3** between Log I (I: fluorescence intensity at 714 nm) and Log η (η: viscosity).

**Fig. S4.** Fluorescence spectra of (a and b) **2** and (c and d) **3** in PBS solutions (0.1 M PBS, pH 7.4) before and after the addition of (a and c) biologically relevant amino acid and (b and d) metal ions, anions and oxidating reagents. All the spectra were compared with that in glycerol.

**Fig. S5.** Fluorescence spectra of **1** in different solvents.

**Fig. S6.** (a) Fluorescence spectra of **3** in acetonitrile-H<sub>2</sub>O mixtures with increasing fraction of H<sub>2</sub>O. (b) The intensity changes at 714 nm for **3** versus the increasing fraction of H<sub>2</sub>O.

**Fig. S7.** MTT assay of SH-SY5Y cells with different concentration of **2** for 24 h.

**Fig. S8.** MTT assay of SH-SY5Y cells with different concentration of **3** for 24 h.

**Fig. S9.** Confocal fluorescence images of **3** in SH-SY5Y cells pretreated with (a) DMEM or (b) LPS for 40 min; and then further treated with **3** for another 30 min.

**Fig. S10.** Fluorescent images of SH-SY5Y cells co-incubated with **3** and LysoTracker or MitoTracker for 30 min at 37°C, respectively.

**Fig. S11.** <sup>1</sup>H and <sup>13</sup>C NMR spectrum of **5** in CDCl<sub>3</sub>.

**Fig. S12.** <sup>1</sup>H NMR spectrum of **6** in CDCl<sub>3</sub>.

**Fig. S13.** <sup>1</sup>H and <sup>13</sup>C NMR spectrum of **2** in DMSO-d<sub>6</sub>.

**Fig. S14.** <sup>1</sup>H and <sup>13</sup>C NMR spectrum of **3** in DMSO-d<sub>6</sub>.

<sup>1</sup>H and <sup>13</sup>C{<sup>1</sup>H} spectra of all the new compounds.

## Experimental section

### 1. General

Nitrogen protection was used for all the reactions. The spectroscopic measurements were performed in deionized water. All the chromatographic purifications were through silica gel (Qingdao Haiyang, 300-400 mesh). Solvents and reagents with analytical or reagent grade were used with received for the measurements and reactions.  $^1\text{H}$  and  $^{13}\text{C}\{^1\text{H}\}$  NMR spectra were recorded with a Bruker AVANCE III 400 or 600 spectrometer ( $^1\text{H}$ , 400 or 600;  $^{13}\text{C}$ , 126 MHz) in  $\text{CDCl}_3$  or  $\text{DMSO-d}_6$ , which were referenced internally using the residual solvent ( $^1\text{H}$ :  $\delta$  7.26 for  $\text{CDCl}_3$  and 2.50 for  $\text{DMSO-d}_6$ ) or solvent ( $^{13}\text{C}$ :  $\delta$  77.16 for  $\text{CDCl}_3$ ) resonances relative to  $\text{SiMe}_4$ . Electrospray ionization (ESI) mass data was recorded on an AB SCIEX TripleTOF 4600 mass spectrometer for all the new compounds. The electronic absorption and fluorescence spectra were performed on a UV-2550 spectrophotometer (Shimadzu, Japan) and a F-4500 spectrofluorometer (Hitachi, Japan), respectively. The corresponding fluorescence quantum yields ( $\Phi_{\text{F}}$ ) were calculated using the equation [S1]:  $\Phi_{\text{F}(\text{sample})} = (F_{\text{sample}}/F_{\text{ref}}) \times (A_{\text{ref}}/A_{\text{sample}}) \times (n_{\text{sample}}^2/n_{\text{ref}}^2) \times \Phi_{\text{F}(\text{ref})}$ , where  $F$ ,  $A$  and  $n$  stand for the integrated area, the absorbance at the excitation wavelength and the corresponding refractive index of solvents. The subscripts sample and ref stand for unknown and the standard samples, respectively. Zinc phthalocyanines (ZnPC) in  $N,N$ -dimethylformamide (DMF) was used as the reference [ $\Phi_{\text{F}(\text{ref})} = 0.28$ ] [S2]. Compound **6** was prepared according to the reported method with slight changes [S3].

## 2. Synthesis

### 2.1. Synthesis of monostyryl BODIPY **5**

A mixture of BODIPY **1** (50 mg, 158  $\mu\text{mol}$ ), benzaldehyde **4** (23.6 mg, 158  $\mu\text{mol}$ ), piperidine (0.20 mL) and acetic acid (0.20 mL) in toluene (20 mL) was heated under 87 °C for 1 h. After cooling, the obtained mixture was further added with petroleum ether and then directly purified by column chromatography using  $\text{CH}_2\text{Cl}_2$ /petroleum ether (from 1:3 to 2:3, v/v) as the eluent to give a dark blue solid (30 mg, 42%).  $^1\text{H}$  NMR (400 MHz,  $\text{CDCl}_3$ ):  $\delta$  7.53-7.48 (m, 3 H, ArH and C=CH), 7.34 (m, 1 H,  $J = 16.0$  Hz, C=CH), 6.80 (s, 1 H, pyrrole-H), 6.67 (d,  $J = 8.8$  Hz, 2 H, ArH), 6.10 (s, 1 H, pyrrole-H), 3.05 (s, 6 H,  $\text{NCH}_3$ ), 2.55 (s, 3 H,  $\text{CH}_3$ ), 2.34 (d,  $J = 3.2$  Hz, 3 H,  $\text{CH}_3$ ), 2.29 (d,  $J = 3.2$  Hz, 3 H,  $\text{CH}_3$ ).  $^{13}\text{C}$  NMR (126 MHz,  $\text{CDCl}_3$ ):  $\delta$  158.0, 153.8, 151.8, 142.7, 141.6, 139.3, 134.8, 130.3, 124.2, 122.8, 121.7, 113.9, 112.1, 40.4, 16.2, 15.8, 15.0. HRMS (ESI):  $m/z$  calcd for  $\text{C}_{23}\text{H}_{23}\text{BF}_5\text{N}_3$  [ $\text{M} + \text{H}$ ] $^+$ : 448.1978; found: 448.1982.

### 2.2. Synthesis of distyryl BODIPY **6**

Compound **6** was prepared according to the reported method with slight changes [S3]. A mixture of BODIPY **1** (50 mg, 158  $\mu\text{mol}$ ), benzaldehyde **4** (70.8 mg, 474  $\mu\text{mol}$ ), piperidine (0.20 mL) and acetic acid (0.20 mL) in toluene (20 mL) was heated under 80 °C for 1 h. After cooling, the obtained mixture was further added with petroleum ether and then directly purified by column chromatography using

CH<sub>2</sub>Cl<sub>2</sub>/petroleum ether (from 1:3 to 1:1, v/v) as the eluent to give a metallic green solid (50 mg, 52%). <sup>1</sup>H NMR (400 MHz, CDCl<sub>3</sub>): δ 7.59-7.53 (m, 6 H, ArH and C=CH), 7.27 (m, 1 H, C=CH, overlapped with the residual of CDCl<sub>3</sub>), 6.78 (s, 2 H, pyrrole-H), 6.70 (d, *J* = 8.8 Hz, 4 H, ArH), 3.05 (s, 12 H, NCH<sub>3</sub>), 2.34 (s, 6 H, CH<sub>3</sub>).

### 2.3. Synthesis of cationic monostyryl BODIPY 2

A mixture of **4** (30 mg, 64.9 μmol) and iodomethane (1 mL) in N, N-dimethylformamide (3 mL) was heated under 80 °C for 2 h. The reaction process was monitored by thin-layer chromatography. After cooling, the obtained mixture was crystallized with ethyl ether and the residual was further dissolved in ethanol with further addition of ethyl ether or petroleum ether for several times to give a dark blue solid (15.0 mg, 38%). <sup>1</sup>H NMR (600 MHz, DMSO-d<sub>6</sub>): δ 8.04 (d, *J* = 8.4 Hz, 2 H, ArH), 7.83 (d, *J* = 9.0 Hz, 2 H, ArH), 7.80 (d, *J* = 16.2 Hz, 1 H, C=CH), 7.56 (d, *J* = 16.2 Hz, 1 H, C=CH), 7.26 (s, 1 H, pyrrole-H), 6.55 (s, 1 H, pyrrole-H), 3.62 (s, 9 H, NCH<sub>3</sub>), 2.53 (s, 3 H, CH<sub>3</sub>), 2.34 (s, 3 H, CH<sub>3</sub>), 2.30 (s, 3 H, CH<sub>3</sub>). <sup>13</sup>C NMR (151 MHz, DMSO-d<sub>6</sub>): δ 160.4, 153.8, 147.6, 146.1, 144.9, 144.8, 143.2, 141.7, 137.4, 137.1, 128.7, 125.9, 121.9, 121.5, 120.9, 119.9, 56.5, 15.6, 15.1. HRMS (ESI): *m/z* calcd for C<sub>24</sub>H<sub>26</sub>BF<sub>5</sub>N<sub>3</sub> [M]<sup>+</sup>: 462.2134; found: 462.2137.

### 2.4. Synthesis of cationic distyryl BODIPY 3

A mixture of **6** (30 mg, 49.3  $\mu\text{mol}$ ) and iodomethane (2 mL) in N, N-dimethylformamide (3 mL) was heated under 80 °C for 2 h. The reaction process was monitored by thin-layer chromatography. After cooling, the obtained mixture was crystallized with ethyl ether and the residual was further dissolved in ethanol with further addition of ethyl ether or petroleum ether for several times to give a dark green solid (19.0 mg, 44%).  $^1\text{H}$  NMR (600 MHz,  $\text{DMSO-d}_6$ ):  $\delta$  8.04 (d,  $J = 9.0$  Hz, 4 H, ArH), 7.90-7.86 (m, 6 H, ArH), 7.61 (d,  $J = 16.8$  Hz, 4 H, ArH), 7.34 (s, 2 H, pyrrole-H), 3.64 (s, 18 H,  $\text{NCH}_3$ ), 2.37 (s, 6 H,  $\text{CH}_3$ ).  $^{13}\text{C}$  NMR (151 MHz,  $\text{DMSO-d}_6$ ):  $\delta$  154.8, 148.0, 142.3, 138.4, 137.8, 133.9, 131.4, 129.3, 128.4, 122.9, 121.9, 120.3, 112.8, 56.9, 16.0. HRMS (ESI):  $m/z$  calcd for  $\text{C}_{34}\text{H}_{38}\text{BF}_5\text{N}_4$   $[\text{M}]^{2+}$ : 304.1550; found: 304.1555.

### *3. Preparation of stock solutions for spectroscopic measurements*

BODIPYs **1-3** (2 mM) in N, N-dimethylformamide were prepared as the stock solutions for all the spectroscopic experiments. All the interfering agents, including the amino acids, metal ions, anions and oxidizing species, were prepared with concentration of 2 mM in aqueous solutions. Solutions of probe (10  $\mu\text{M}$ ) in different solvents or with different concentration of interfering species (100  $\mu\text{M}$ ) in phosphate buffer saline (abbreviated as PBS, 0.1 M PBS, pH 7.4) were prepared for use and stored in refrigerator for one night. And then all the UV-Vis and fluorescence

spectroscopic measurements were performed after the samples were kept for 30 minutes in room temperature.

For preparing different fractions of glycerol and water mixtures (20 mL), we firstly calculated the corresponding weight of glycerol and water in each mixture, and then prepared them on a balance. Finally, the probes in stock solution were added to the each mixture (3 mL) and shook up the mixtures. At 20 °C, water has a viscosity ( $\eta$ ) of 1.00 cP and glycerol has a viscosity of 950.17 cP. Viscosity for the mixtures was calculated using the following equation [S4]:

$$\ln(\eta_{\text{mix}}) = \sum w_i \times \ln(\eta_i)$$

where  $\eta_{\text{mix}}$  is the viscosity of the mixture,  $\eta_i$  is the viscosity of each component, and  $w_i$  is the weighting factor ( $0 < w < 1$ ) of each component.

#### *4. General procedures of cell culture and MTT assay*

SH-SY5Y cells were used with Dulbecco's modified Eagle's medium (DMEM) with high glucose, as the culture medium under the atmosphere of 5% CO<sub>2</sub> at 37 °C for 48 h. To evaluate the cytotoxicity of these two probes, MTT assay were used. SH-SY5Y cells were seeded onto a 96-well cell-culture plate with  $1.5 \times 10^4$  cells/well for 24 h. Then, various concentrations of probe (0, 3.125, 6.25, 12.5, 25, 50 and 100  $\mu\text{M}$ ) in DMEM were added to the wells. After another 48 h, MTT (10  $\mu\text{L}$ , 5 mg/mL) was added to each well and incubated at 37 °C for another 4 h. The MTT solutions were removed and purple precipitates (formazan) observed in plates, which were further

dissolved in dimethyl sulfoxide (DMSO, 100  $\mu$ L). Microplate reader was used to measure the absorbance at 570 nm for each well.

### *5. Cell imaging*

The confocal imaging experiments were performed using a 20-mm confocal dish and SH-SY5Y cells ( $1.5 \times 10^4$  cells/well). The cells were firstly passed and adhered for two days. The cells were firstly cultured with lipopolysaccharide (LPS) (20  $\mu$ M) for 40 min. And then PBS was used to wash the cells for three times. Then, the freshly prepared stock solutions of **2** or **3** (5  $\mu$ M in DMEM) were added to the cells, which were pretreated with LPS or none-pretreated ones. The probes were further cultured for 30 min at 37  $^{\circ}$ C. A Leica TCS SP8 confocal microscope (Germany) was used to perform Confocal imaging with a 63  $\times$  oil-immersion objective lens. The samples were excited at 633 nm with an argon ion laser and emissions were collected at 650-750 nm.

For the subcellular cell imaging, SH-SY5Y cells were chosen and cultured for for 48 h. And then, probe (5  $\mu$ M) with Mito-tracker Green or Lyso-tracker Green (1  $\mu$ M) in DMEM were used to culture the cells for 30 min. After washing, the cells with PBS for three times, Confocal imaging was performed with excitation at 488 nm and emissions at the range of 500-600 nm for the Mito-tracker and Lyso-tracker. The two near-infrared fluorescent probes were excited at 633 nm with an argon ion laser and emissions were collected at 650-750 nm.



## References

- [S1] R. A. Velapoldi and H. H. Tønnesen, *J. Fluoresc.* 2004, **14**, 465.
- [S2] I. Scalise and E. N. Durantini, *Bioorg. Med. Chem.* 2005, **13**, 3037.
- [S3] X.-D. Jiang, T. Fang, X. Liu and D. Xi, *Eur. J. Org. Chem.* 2017, **34**, 5074.
- [S4] A. Dragan, A. E. Graham and C. D. Geddes, *J. Fluoresc.* 2014, **24**, 397.

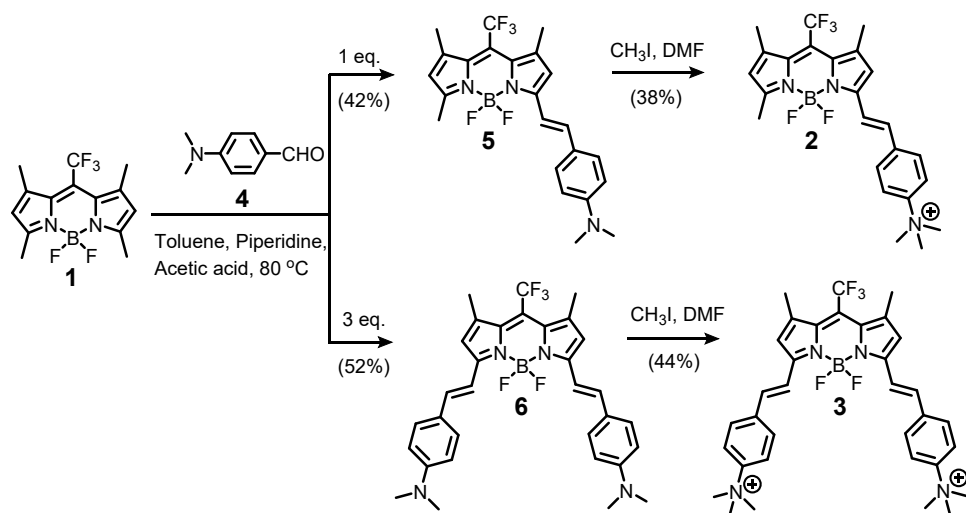

**Scheme S1.** Synthetic route of near-infrared fluorescent probes **2** and **3**.

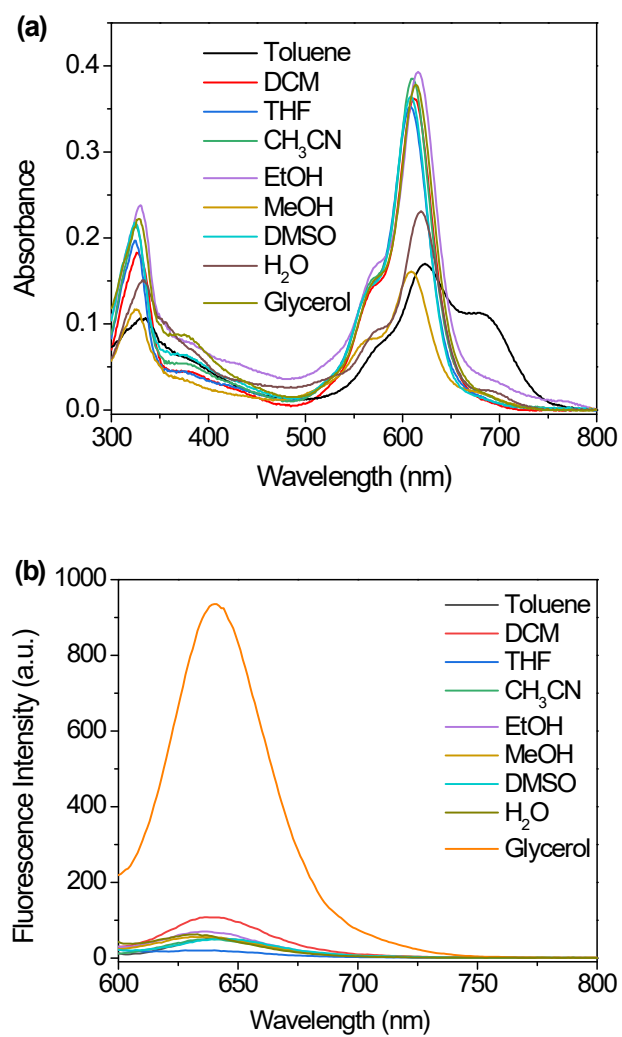

**Fig. S1.** (a) UV-Vis and (b) fluorescence spectra of **2** (10 μM) in different solvents.

( $\lambda_{\text{ex}} = 580 \text{ nm}$ )

**Table S1.** The spectroscopic properties of **2** in different solvents.

| Solvents           | $\lambda_{\text{max}}$ (nm) ( $\log \epsilon$ ) | $\lambda_{\text{em}}$ (nm) | $\Phi_{\text{F}}^a$ |
|--------------------|-------------------------------------------------|----------------------------|---------------------|
| Toluene            | 335 (4.03), 623 (4.23), 684 (4.05)              | 643                        | 0.03                |
| DCM                | 325 (4.26), 611 (4.56)                          | 640                        | 0.03                |
| THF                | 325 (4.29), 608 (4.55)                          | 641                        | 0.006               |
| CH <sub>3</sub> CN | 325 (4.33), 611 (4.59)                          | 638                        | 0.009               |
| EtOH               | 330 (4.38), 616 (4.59)                          | 638                        | 0.015               |
| MeOH               | 326 (4.07), 609 (4.21)                          | 638                        | 0.025               |
| DMSO               | 325 (4.33), 608 (4.56)                          | 645                        | 0.015               |
| H <sub>2</sub> O   | 332 (4.18), 618 (4.36), 700 (3.28)              | 625                        | 0.033               |
| Glycerol           | 329 (4.35), 615 (4.58)                          | 636                        | 0.26                |

<sup>a</sup> All was excited at 580 nm and using zinc phthalocyanine in DMF as the reference ( $\Phi_{\text{F}} = 0.28$ ).

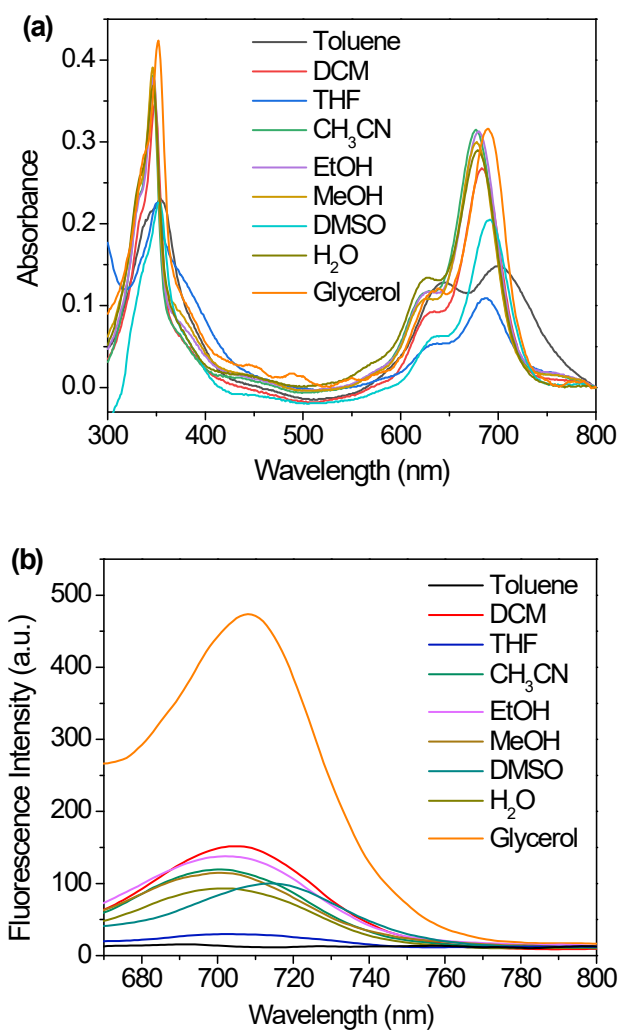

**Fig. S2.** (a) UV-Vis and (b) fluorescence spectra of **3** (10  $\mu\text{M}$ ) in different solvents.

( $\lambda_{\text{ex}} = 630 \text{ nm}$ )

**Table S2.** The spectroscopic properties of **3** in different solvents.

| Solvents           | $\lambda_{\max}$ (nm) ( $\log \epsilon$ ) | $\lambda_{\text{em}}$ (nm) | $\Phi_{\text{F}}^a$ |
|--------------------|-------------------------------------------|----------------------------|---------------------|
| Toluene            | 346 (4.58), 677 (4.50)                    | ---                        | ---                 |
| DCM                | 353 (4.35), 691 (4.31)                    | 705                        | 0.01                |
| THF                | 346 (4.57), 679 (4.50)                    | 705                        | 0.002               |
| CH <sub>3</sub> CN | 352 (4.62), 690 (4.50)                    | 701                        | 0.002               |
| EtOH               | 347 (4.58), 680 (4.50)                    | 703                        | 0.007               |
| MeOH               | 346 (4.59), 679 (4.47)                    | 702                        | 0.005               |
| DMSO               | 353 (4.35), 691 (4.31)                    | 715                        | 0.006               |
| H <sub>2</sub> O   | 347 (4.57), 679 (4.46)                    | 703                        | 0.006               |
| Glycerol           | 352 (4.63), 689 (4.50)                    | 714                        | 0.039               |

<sup>a</sup> All was excited at 630 nm and using zinc phthalocyanine in DMF as the reference ( $\Phi_{\text{F}} = 0.28$ ).

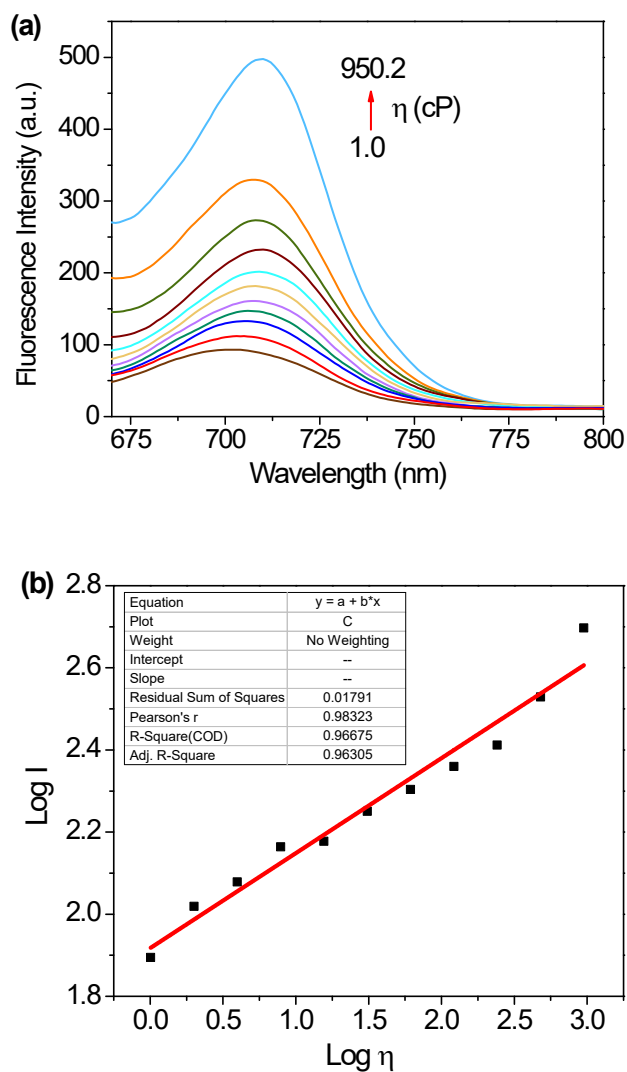

**Fig. S3.** (a) Fluorescence spectra of **3** (10  $\mu\text{M}$ ) in glycerol- $\text{H}_2\text{O}$  mixtures with increasing viscosity from 1.0 to 950.2 cp. (b) The linear relationship of **3** (10  $\mu\text{M}$ ) between Log I (I: fluorescence intensity at 714 nm) and Log  $\eta$  ( $\eta$ : viscosity). ( $\lambda_{\text{ex}} = 630 \text{ nm}$ )

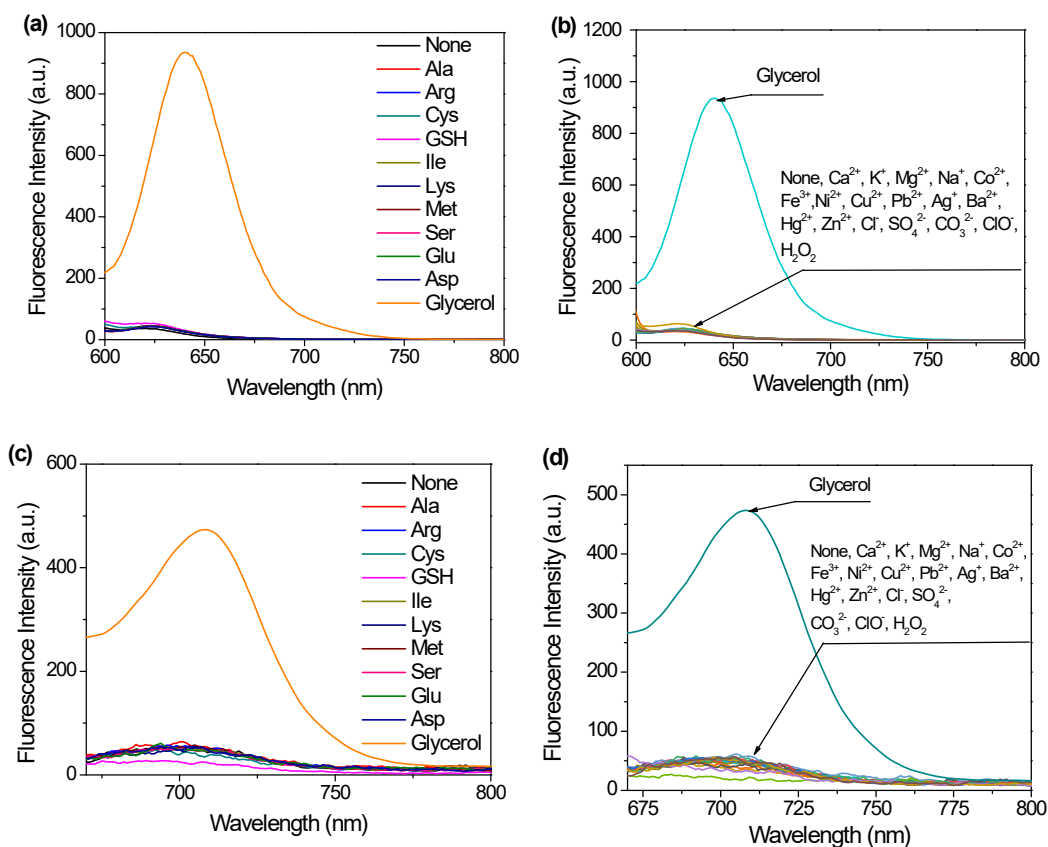

**Fig. S4.** Fluorescence spectra of (a and b) **2** and (c and d) **3** (10  $\mu$ M) in PBS solutions (0.1 M PBS, pH 7.4) before and after the addition of (a and c) biologically relevant amino acid and (b and d) metal ions, anions and oxidizing reagents (100  $\mu$ M). All the spectra were compared with that in glycerol. ( $\lambda_{\text{ex}} = 580$  nm for **2** and 630 nm for **3**)



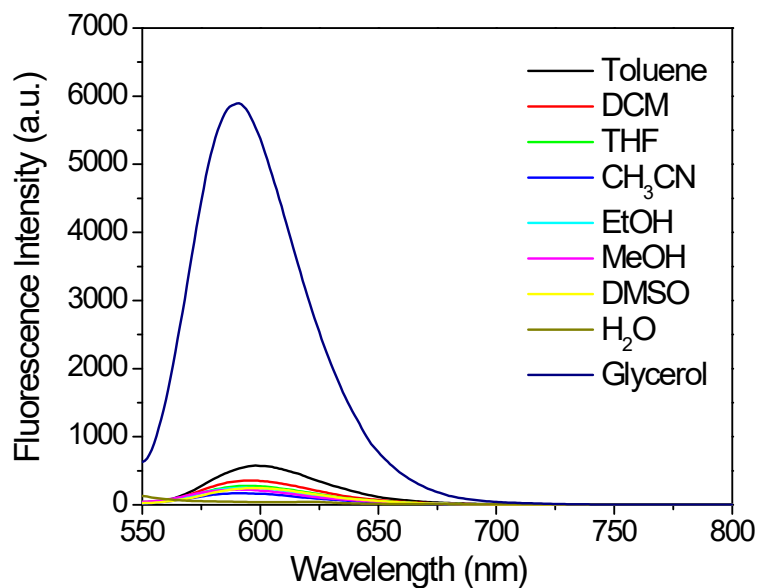

**Fig. S5.** Fluorescence spectra of **1** (10 μM) in different solvents. ( $\lambda_{\text{ex}} = 530$  nm)

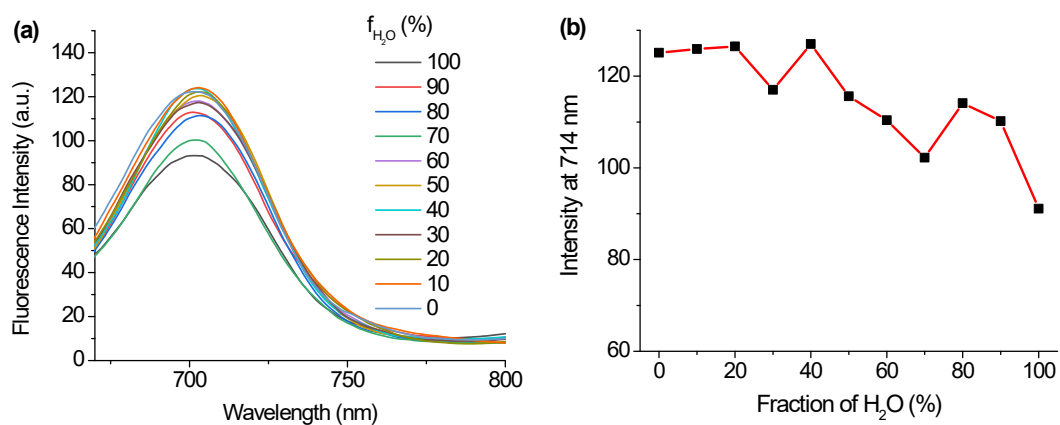

**Fig. S6.** (a) Fluorescence spectra of **3** (10 μM) in acetonitrile-H<sub>2</sub>O mixtures with increasing fraction of H<sub>2</sub>O. (b) The intensity changes at 714 nm for **3** versus the increasing fraction of H<sub>2</sub>O. ( $\lambda_{\text{ex}} = 630$  nm)

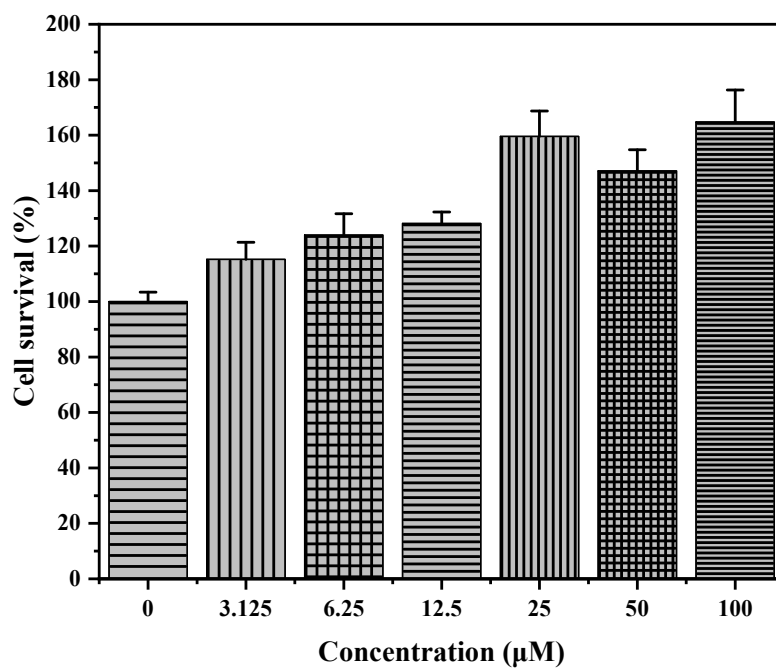

**Fig. S7.** MTT assay of SH-SY5Y cells with different concentration of **2** (0-100 μM) for 24 h.

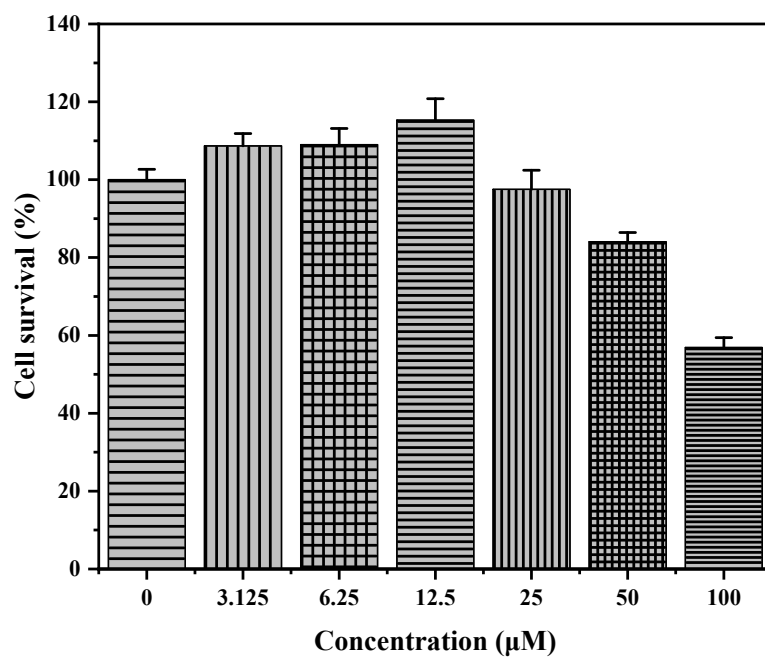

**Fig. S8.** MTT assay of SH-SY5Y cells with different concentration of **3** (0-100 μM) for 24 h.

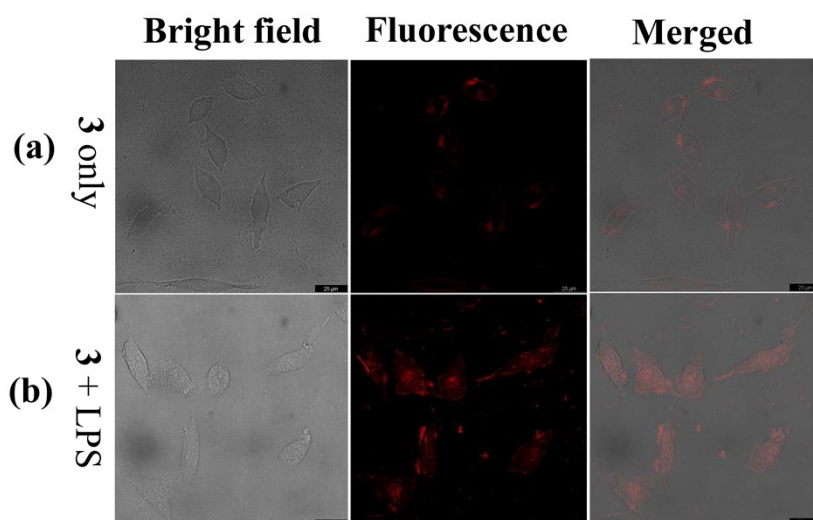

**Fig. S9.** Confocal fluorescence images of **3** in SH-SY5Y cells pretreated with (a) DMEM or (b) LPS (20  $\mu$ M) for 40 min; and then further treated with **3** (5  $\mu$ M) for another 30 min. ( $\lambda_{\text{ex}} = 633$  nm,  $\lambda_{\text{em}} = 650$ -750 nm)

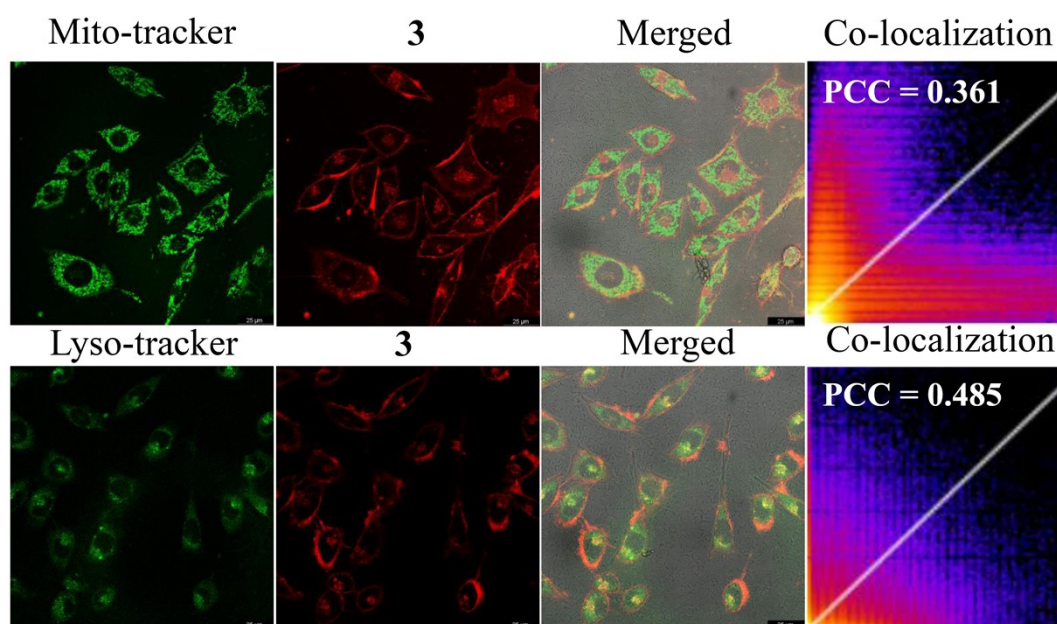

**Fig. S10.** Fluorescent images of SH-SY5Y cells co-incubated with **3** (5  $\mu$ M) and Lyso- or Mito-tracker for 30 min at 37°C, respectively. For **3**,  $\lambda_{\text{ex}} = 633$  nm,  $\lambda_{\text{em}} = 650$ -750 nm; for Mito-tracker or Lyso-tracker,  $\lambda_{\text{ex}} = 488$  nm,  $\lambda_{\text{em}} = 500$ -600 nm.

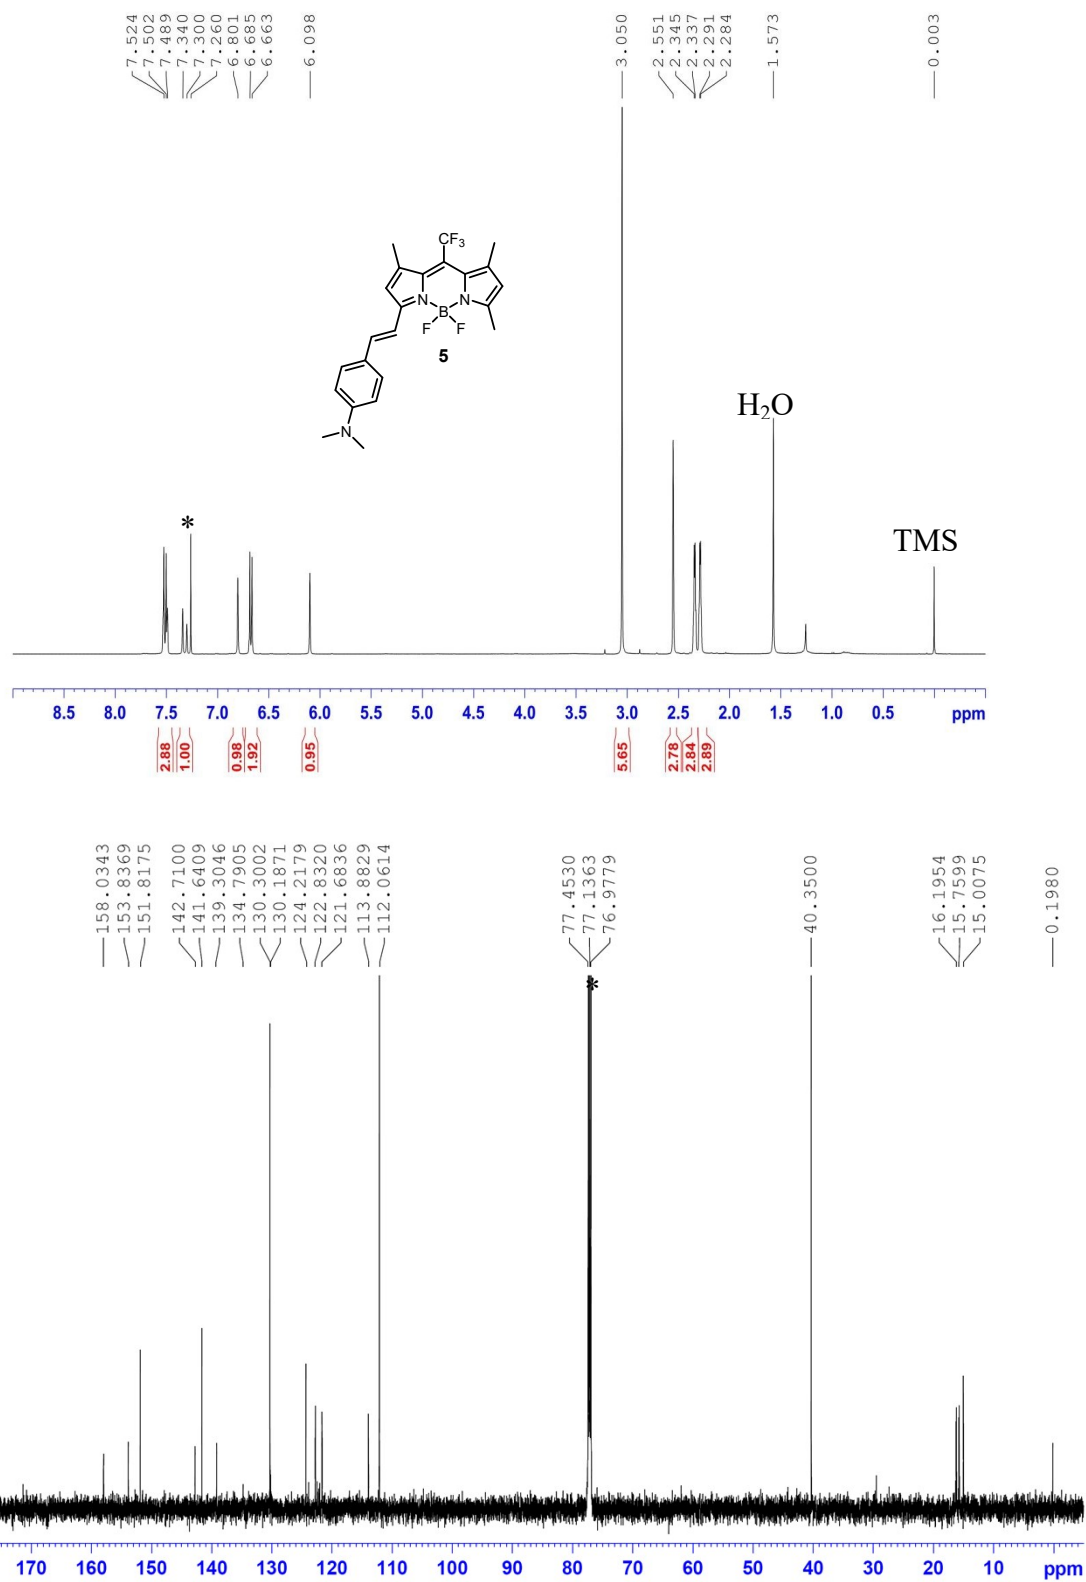

**Fig. S11.** <sup>1</sup>H and <sup>13</sup>C NMR spectrum of **5** in CDCl<sub>3</sub>.

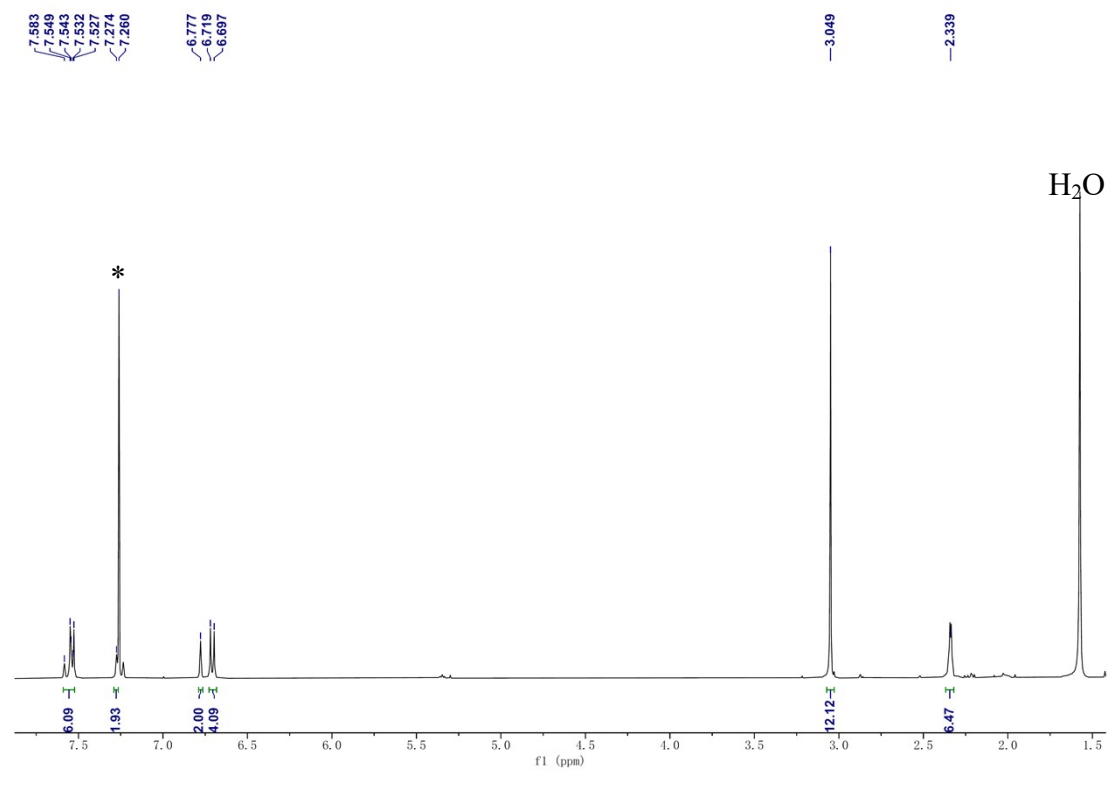

**Fig. S12.** <sup>1</sup>H NMR spectrum of **6** in CDCl<sub>3</sub>.

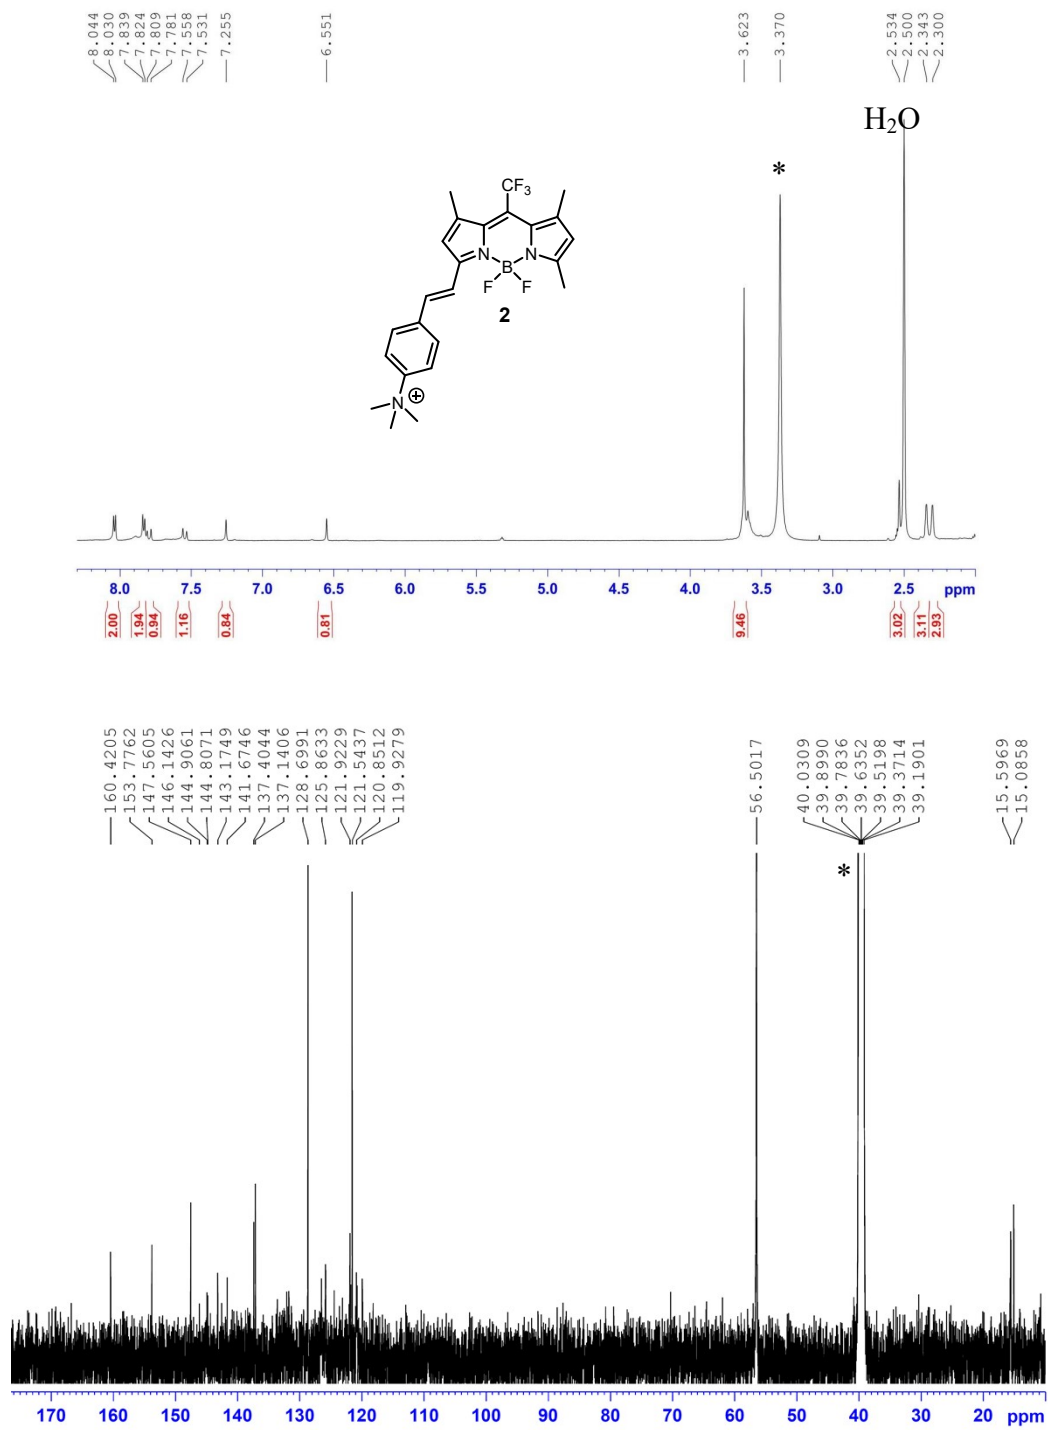

**Fig. S13.** <sup>1</sup>H and <sup>13</sup>C NMR spectrum of **2** in DMSO-d<sub>6</sub>.

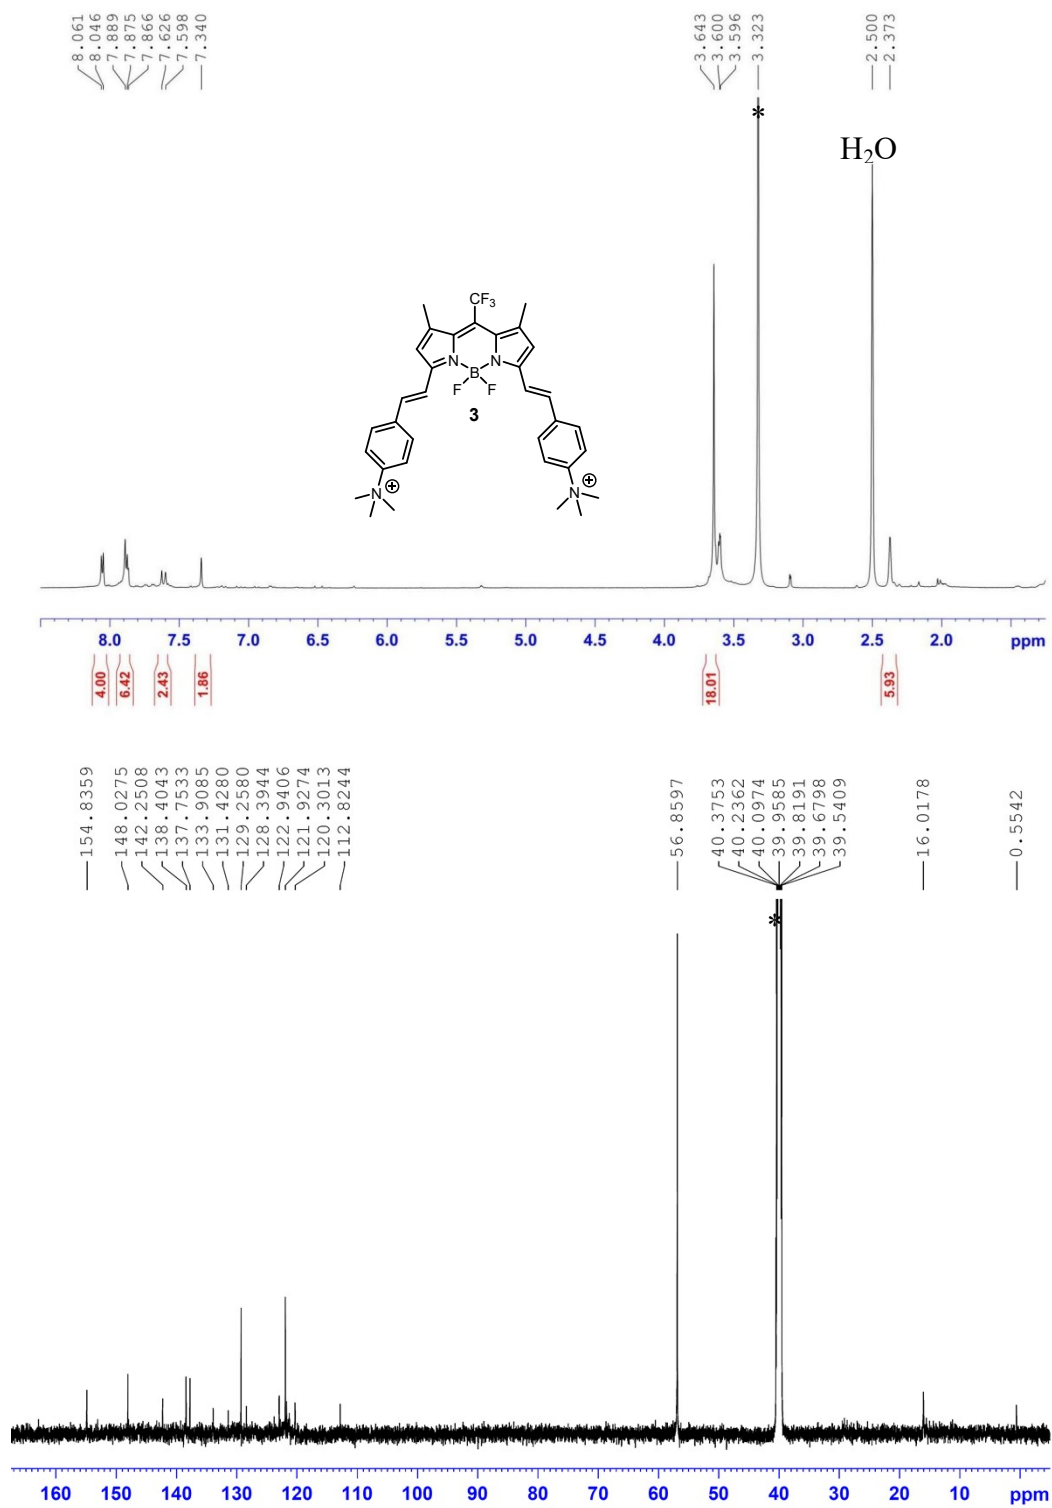

**Fig. S14.** <sup>1</sup>H and <sup>13</sup>C NMR spectrum of **3** in DMSO-d<sub>6</sub>.
